# Supplementary material
Source: PubMed Central journal article supplement (PMC4523231)
Supplement: NIHMS709482-supplement-Supplemental_Data.pdf [file NIHMS709482-supplement-Supplemental_Data.pdf]

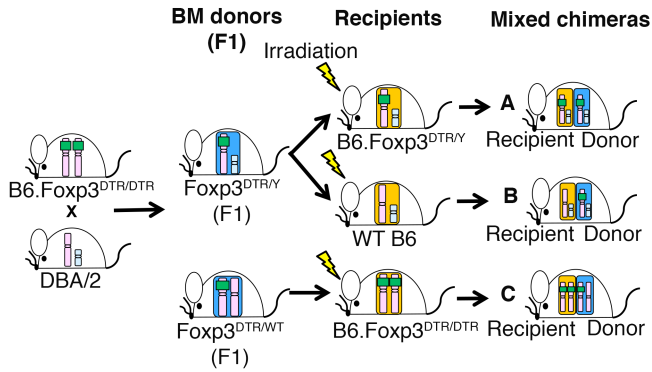

**Figure S1: Establishment of mixed chimeras so that both donor and recipient-derived  $\text{Foxp3}^+$  cells can be depleted or only donor or recipient-derived  $\text{Foxp3}^+$  cells can be retained after DT treatment.** B6. Foxp3DTR female mice homozygous for the DTR gene were crossed with DBA/2 male mice to obtain F1 generation. F1 mice were used as bone-marrow donors. Three different types of DTR-expressing recipients were created, represented as Groups A, B, and C. Long and short bars represent X and Y chromosomes, respectively. Green boxes represent the '*Foxp3DTR*' gene.

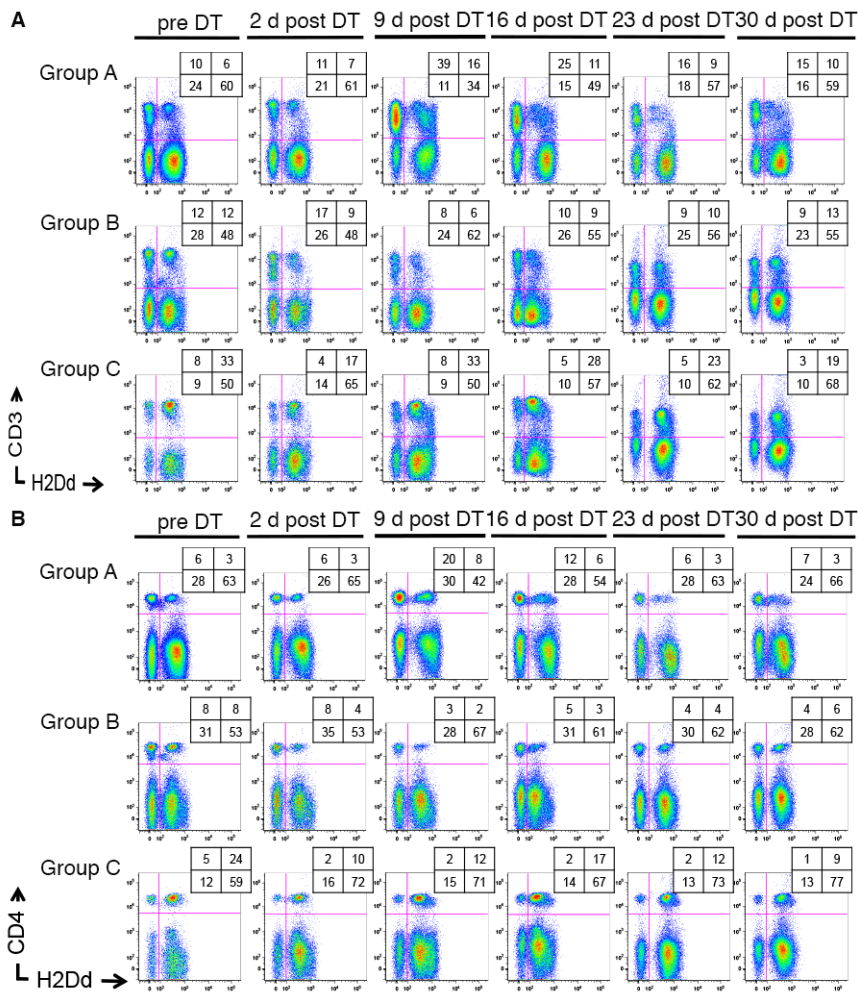

**C** pre DT 2 d post DT 9 d post DT 16 d post DT 23 d post DT 30 d post DT

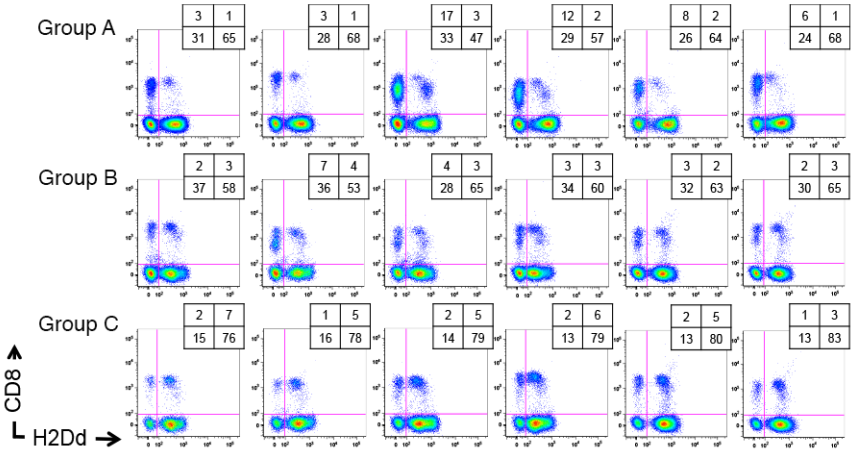

**D** pre DT 2 d post DT 9 d post DT 16 d post DT 23 d post DT 30 d post DT

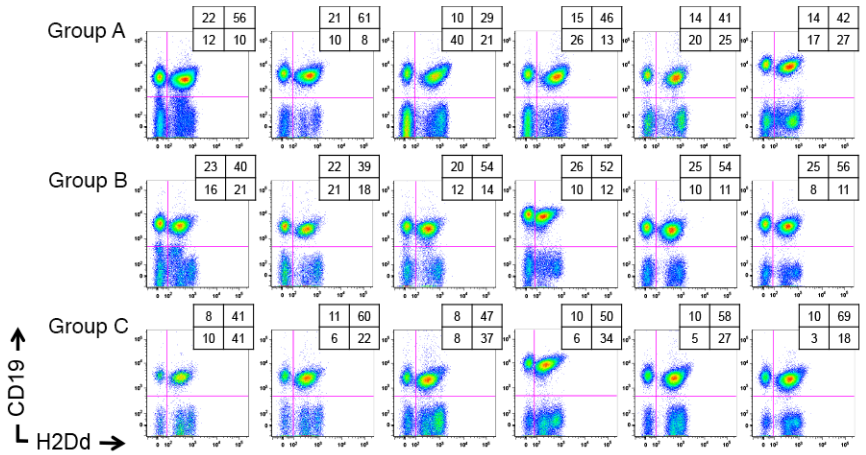

**E** pre DT 2 d post DT 9 d post DT 16 d post DT 23 d post DT 30 d post DT

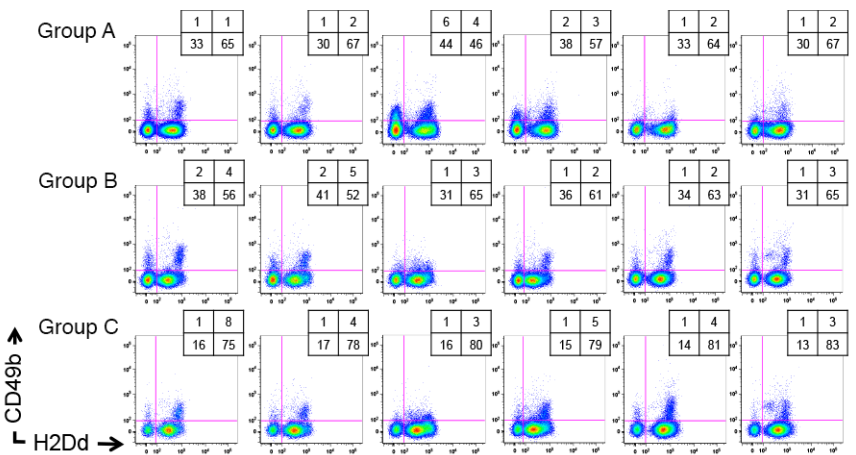

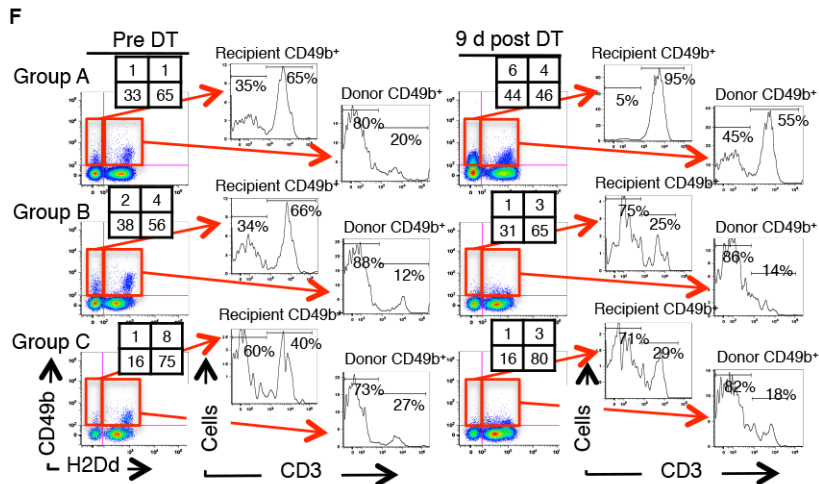

**Figure S2 Transient changes in the levels of lymphocyte subsets in the peripheral blood (PBL) following DT treatment.** (A-E) PBL were collected at the indicated time points and co-stained with anti-H-2D<sup>d</sup> (donor MHC class I) and anti-CD3 (A), anti-CD4 (B), anti-CD8 (C), anti-CD19 (D), or anti-CD49b (E). Inset shows the percentage of events in PBL in each quadrant. (F) Histograms show CD3 staining within the recipient or donor CD49b<sup>+</sup> subpopulation. Data were obtained pre-DT and 9 days post DT treatment from each group.

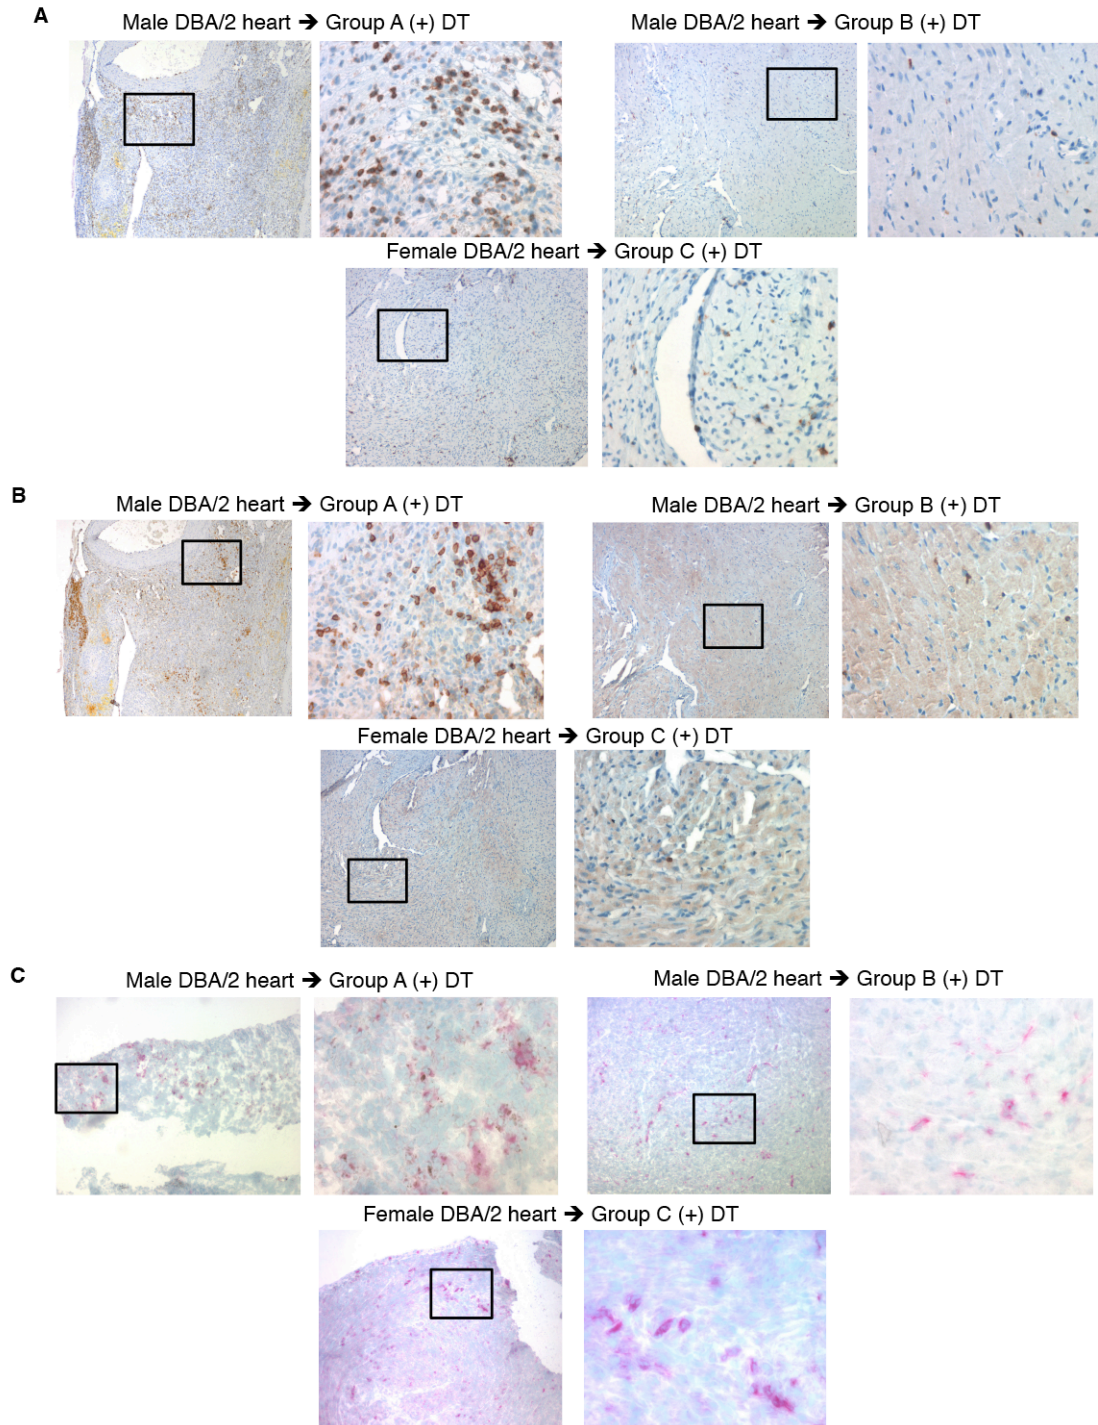

**Figure S3 Immunohistochemical staining of DBA/2 cardiac allografts from each recipient.** DBA/2 cardiac allografts from each recipient were stained with anti-CD3 (A), anti-B220 (B), and anti-Ly49g2 (C). Original magnification for each image is 100x. The areas highlighted in the small boxes in the left panels (100x) are shown in the right panels at a magnification of 400x.

**Table S1** Multilineage mixed chimerism in PBL (12 w after BMT) (% in the whole PBL)

|                    | Group A     |             | Group B    |             | Group C     |             |
|--------------------|-------------|-------------|------------|-------------|-------------|-------------|
|                    | Recipient   | Donor       | Recipient  | Donor       | Recipient   | Donor       |
| Lymphocytes        | 24.9 ± 15.5 | 75.1 ± 15.7 | 19.5 ± 5.8 | 80.5 ± 5.8  | 35.7 ± 10.1 | 64.3 ± 10.1 |
| CD19 <sup>+</sup>  | 14.5 ± 13.5 | 56.5 ± 14.9 | 7.3 ± 3.3  | 48.4 ± 11.4 | 22.2 ± 6.2  | 50.9 ± 6.2  |
| CD3 <sup>+</sup>   | 7.9 ± 4.7   | 8.9 ± 3.6   | 6.9 ± 2.0  | 19.3 ± 8.2  | 10.0 ± 4.2  | 7.4 ± 4.5   |
| CD4 <sup>+</sup>   | 5.6 ± 3.1   | 5.1 ± 2.3   | 3.5 ± 1.4  | 13.5 ± 6.4  | 6.8 ± 2.3   | 4.4 ± 3.6   |
| CD8 <sup>+</sup>   | 2.3 ± 1.2   | 2.6 ± 1.7   | 2.7 ± 1.2  | 4.7 ± 1.6   | 4.0 ± 2.3   | 2.3 ± 0.4   |
| Foxp3 <sup>+</sup> | 0.6 ± 0.2   | 0.4 ± 0.2   | 0.4 ± 0.1  | 1.5 ± 0.6   | 0.8 ± 0.1   | 0.6 ± 0.1   |
| CD11c <sup>+</sup> | 1.6 ± 0.9   | 4.1 ± 1.2   | 0.3 ± 0.1  | 1.6 ± 0.2   | 0.9 ± 0.4   | 2.4 ± 0.6   |
| CD49b <sup>+</sup> | 1.0 ± 0.5   | 2.0 ± 1.5   | 0.9 ± 0.2  | 5.0 ± 2.6   | 1.8 ± 0.4   | 4.0 ± 0.5   |

\*Numbers reflect the percentages of each cell type within the whole peripheral blood lymphocytes.

Results represent mean values ± s.e.m. of 12, 6, and 5 recipients in Groups A, B, and C, respectively.

**Table S2** Heterogeneity of the outcome of allograft rejection

|                              | Acceptance of heart allograft | Rejection of heart allograft |
|------------------------------|-------------------------------|------------------------------|
| Acceptance of skin allograft | 1                             | 1                            |
| Rejection of skin allograft  | 2                             | 8                            |
